# Supplementary material for: Quaternary CZTS nanoparticle decorated CeO2 as a noble metal free p–n heterojunction photocatalyst for efficient hydrogen evolution
Source: Royal Society of Chemistry journal article supplement (doi:10.1039/c9cy00429g), 2019-01-01
Supplement: c9cy00429g1.pdf [file c9cy00429g1.pdf]

## Quaternary CZTS nanoparticle decorated CeO<sub>2</sub> as a noble metal free p-n heterojunction photocatalyst for efficient hydrogen evaluation

M. Sridharan<sup>a</sup>, P. Kamaraj<sup>a,\*</sup>, Yun Suk Huh<sup>b</sup>, S. Devikala<sup>a</sup>, M. Arthanareeswai<sup>a</sup>, J. Arockiaselvi<sup>a</sup> and E. Sundaravadivel<sup>a</sup>

<sup>a</sup>Department of Chemistry, SRM Institute of Science and Technology, Kattankulathur-603 203, India.

<sup>b</sup>Department of Biological Engineering, College of Engineering, INHA University, Incheon, Korea.

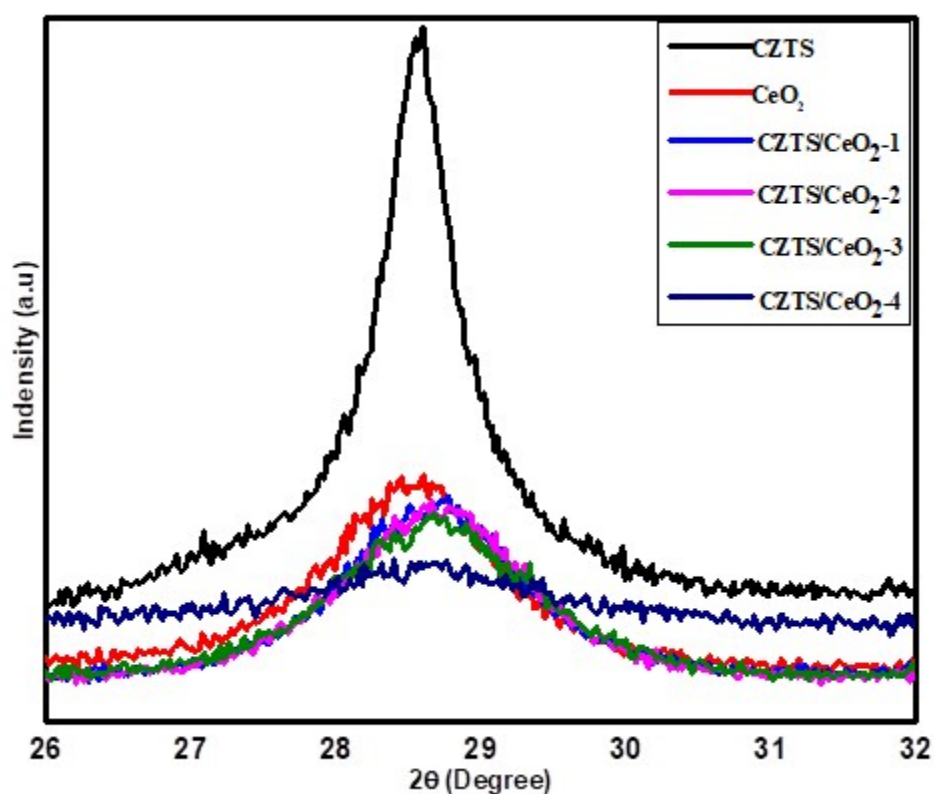

Fig.S1. High resolution XRD patterns of CZTS, CeO<sub>2</sub>, CZTS/CeO<sub>2</sub>-1, CZTS/CeO<sub>2</sub>-2, CZTS/CeO<sub>2</sub>-3 and CZTS/CeO<sub>2</sub>-4.

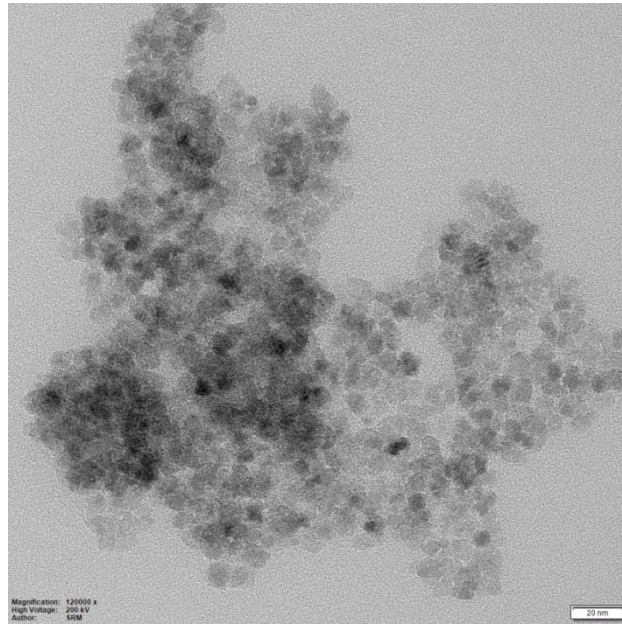

Fig.S2. (a) TEM image of the CZTS nanoparticle

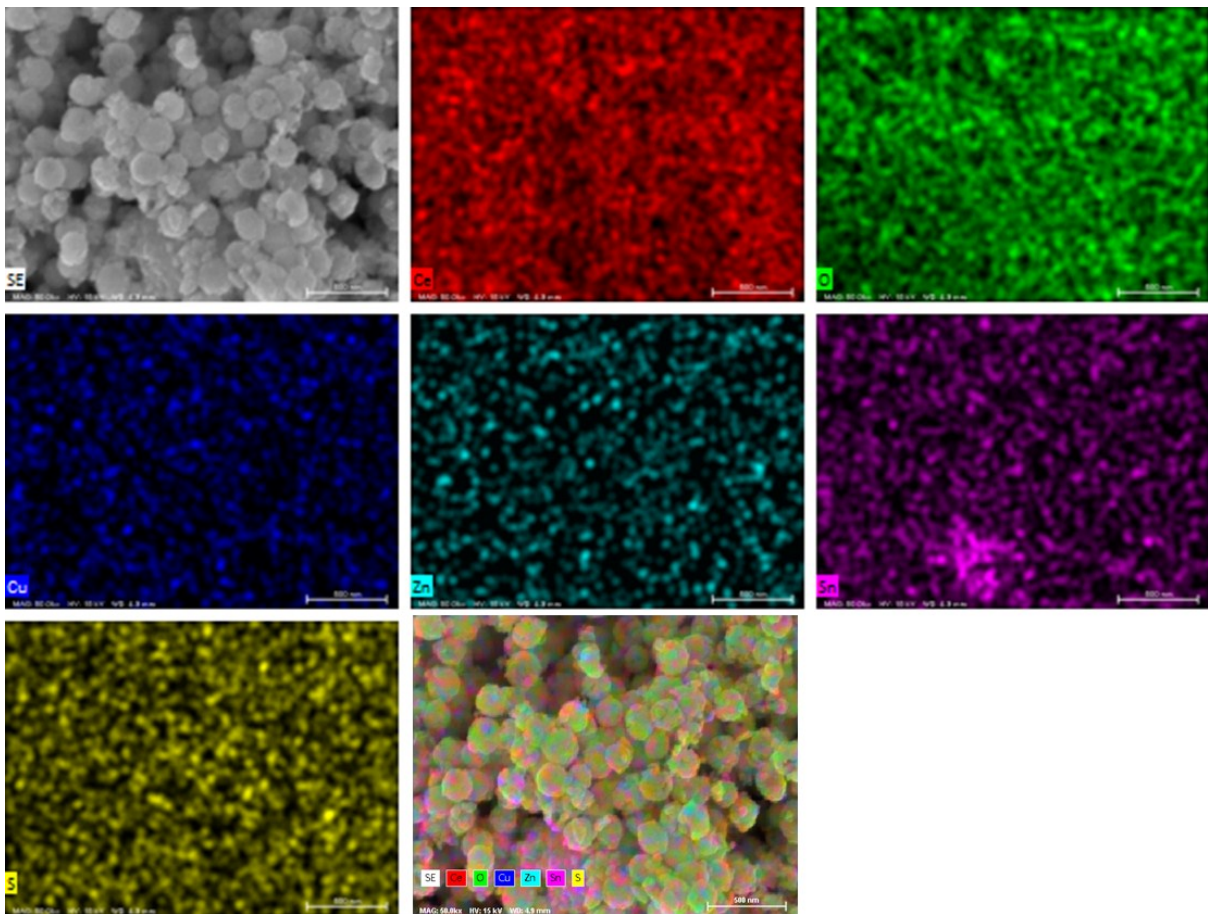

Fig. S3. SEM EDS mapping of Ce, O, Cu, Zn, Sn and S for CZTS/CeO<sub>2</sub>

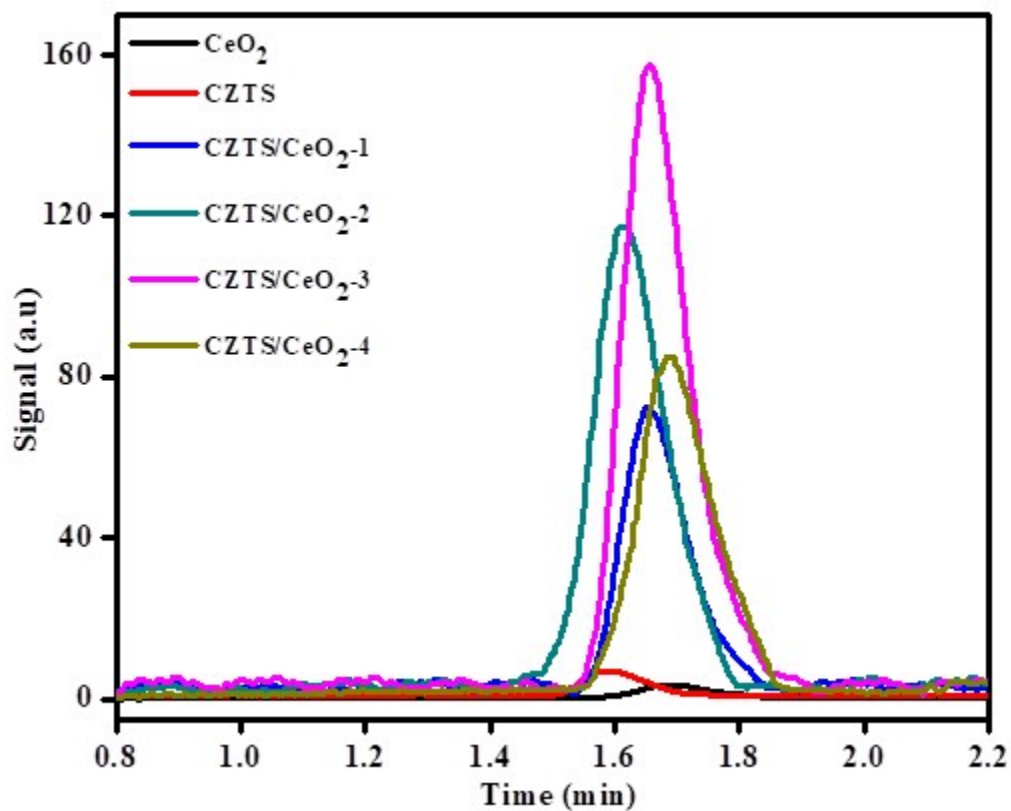

Fig. S4 The H<sub>2</sub> peaks in GC graph for photocatalytic hydrogen production reaction using CeO<sub>2</sub>, CZTS and CZTS/CeO<sub>2</sub> composites

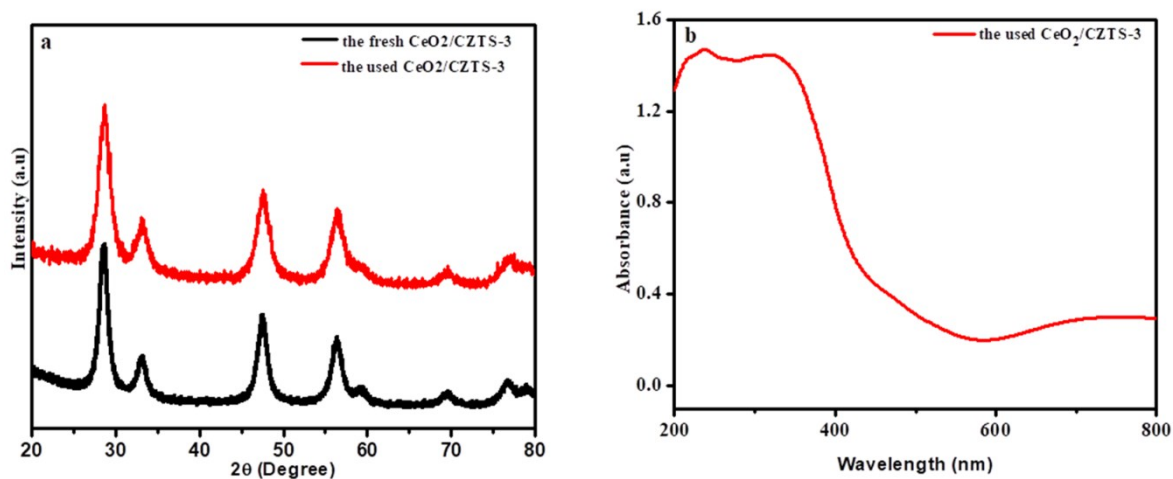

Fig. S5 (a) XRD pattern of the CeO<sub>2</sub>/CZTS-3 before and after photoreaction: (b) UV-Visible spectra of CeO<sub>2</sub>/CZTS-3 after photoreaction

**Table S1.** Comparison Table on Photocatalytic H<sub>2</sub> evaluation rate of CeO<sub>2</sub>/CZTS-3 with Other CeO<sub>2</sub> and CZTS Based Composites

| S.No      | Photocatalyst                                     | cocatalyst | Reaction condition                                                                                                                  | H <sub>2</sub> evaluation rate (mmol·g <sup>-1</sup> ·h <sup>-1</sup> ) | Ref.             |
|-----------|---------------------------------------------------|------------|-------------------------------------------------------------------------------------------------------------------------------------|-------------------------------------------------------------------------|------------------|
| 1         | CeO <sub>2</sub> /CdS QDs                         | -          | Light source: 300W Xe Lamp -Visible<br>hole scavengers:<br>Na <sub>2</sub> SO <sub>3</sub> and Na <sub>2</sub> S                    | ca. 0.101                                                               | S1               |
| 2         | CeO <sub>2</sub> /g-C <sub>3</sub> N <sub>4</sub> | Pt         | Light source : 300W Xe Lamp -Visible<br>hole scavengers:<br>triethanolamine                                                         | ca. 1.1                                                                 | S2               |
| 3         | CeO <sub>2</sub> /MoS <sub>2</sub>                | -          | Light source : 150W Xe Lamp -Visible<br>hole scavengers:<br>methanol                                                                | ca. 2.542                                                               | S3               |
| 4         | CZTS                                              | Pt         | Light source : 300W Xe Lamp -Visible<br>hole scavengers:<br>methanol                                                                | ca. 0.645                                                               | S4               |
| 5         | CZTS-Pt                                           | -          | Light source : 300W Xe Lamp -Visible<br>hole scavengers:<br>Na <sub>2</sub> SO <sub>3</sub> and Na <sub>2</sub> S                   | 1.02                                                                    | S5               |
| 6         | CZTS-PtCo                                         | -          | Light source : 300W Xe Lamp -Visible<br>hole scavengers:<br>Na <sub>2</sub> SO <sub>3</sub> and Na <sub>2</sub> S                   | 1.85                                                                    | S5               |
| 7         | CZTS-CdS                                          | Pt         | Light source :300W Xe Lamp -Visible<br>hole scavengers:<br>Na <sub>2</sub> SO <sub>3</sub> and Na <sub>2</sub> S                    | 11.54                                                                   | S6               |
| 8         | CZTS-MoS <sub>2</sub>                             | -          | Light source :500W Tungsten lamp, UV<br>-Visible light<br>hole scavengers:<br>Na <sub>2</sub> SO <sub>3</sub> and Na <sub>2</sub> S | ca. 1.32                                                                | S7               |
| 9         | CZTS-ZnS                                          | -          | Light source : UV –<br>Visible light<br>hole scavengers:<br>Na <sub>2</sub> SO <sub>3</sub> and Na <sub>2</sub> S                   | ca. 0.432                                                               | S8               |
| <b>10</b> | <b>CZTS/CeO<sub>2</sub></b>                       | <b>-</b>   | <b>Light source : 300W Xe Lamp - Visible<br/>hole scavengers:<br/>Na<sub>2</sub>SO<sub>3</sub>and Na<sub>2</sub>S</b>               | <b>2.93</b>                                                             | <b>This work</b> |

## References

- S1. Y.Ma, Y.Bian, Y.Liu, A.Zhu, H.Wu, H.Cui, D.Chu, J.Pan, *ACS Sustainable Chem. Eng.*, 2018, 6, 2552-2562.
- S2. W.Zou, B.Deng, X.Hu, Y.Zhou, Y.Pu, S.Yu, K.Ma, J.Sun, H.Wan, L.Dong, *Appl. Catal., B-Environ.*, 2018, 238, 111-118.
- S3. G.Swain, S.Sultana, B.Naik, K.Parida, *ACS Omega*, 2017, 2, 3745-3753.
- S4. C.Zhi-Xian, C.Rui-Feng, M.Yue-Na, Z.Wen-Hui, K.Dong-Xing, Z.Zheng-Ji, W.Si-Xin, *Int.J.Hydrogen Energy*, 40, 2015, 13456-13462.
- S5. X.Yu, X.An, A.Genc, M.Ibanez, J.Arbiol, Y.Zhang, A.Cabot, *J.Phys.Chem.C*, 2017, 121, 21882-21888.
- S6. M.Yuan, Z.Wen-Hui, K.Dong-Xiang, Z.Zheng-Ji, M.Yue-Na, W.Si-Xin, *Int.J.Hydrogen Energy*, 2018, 45, 20408-20416.
- S7. G.Gogoi, S.Arora, N.Vinoth kumar, M.De, M.Qureshi, *RSC Adv.*, 2015, 5, 40475-40483.
- S8. F.Jiang, B.Pan, D.You, Y.Zhou, X.Wang, W.Su, *Catal. Commun.*, 2016, 85, 39-43.
